# Supplementary material for: A new multi-functional Cu(ii)-organic framework as a platform for selective carbon dioxide chemical fixation and separation of organic dyes
Source: Royal Society of Chemistry journal article supplement (doi:10.1039/d1ce01274f), 2021-01-01
Supplement: d1ce01274f1.pdf [file d1ce01274f1.pdf]

## Supporting Information

### A New Multi-Functional Cu(II)-Organic Framework as a Platform for Selective Carbon Dioxide Chemical Fixation and Separation of Organic Dyes

Yang-Tian Yan,<sup>\*a</sup> Chen-Yang Wang,<sup>a</sup> Li-Na Zheng,<sup>a</sup> Yun-long Wu,<sup>a</sup> Jiao Liu,<sup>b</sup> Wei-Ping Wu,<sup>c</sup> Wen-Yan Zhang<sup>b</sup> and Yao-Yu Wang<sup>b</sup>

<sup>a</sup> School of Materials Science & Engineering, Xi'an Polytechnic University, Xi'an 710048, P. R. China.

<sup>b</sup> Key Laboratory of Synthetic and Natural Functional Molecule of Ministry of Education, Shaanxi Key Laboratory of Physico-Inorganic Chemistry, College of Chemistry & Materials Science, and, School of Chemical Engineering, Northwest University, Xi'an 710127, P. R. China.

<sup>c</sup> College of Chemistry and Environmental Engineering and Key Laboratory of Green Chemistry of Sichuan Institutes of Higher Education, Sichuan University of Science and Engineering, Zigong 643000, P. R. China.

**Table S1.** Selected bond lengths (Å) and bond angles (°) for **1**

| Complex <b>1</b>     |           |                      |            |
|----------------------|-----------|----------------------|------------|
| Cu(1)-O(2)#2         | 1.959(3)  | O(2)#1-Cu(1)-Cu(1)#1 | 83.66(14)  |
| Cu(1)-O(2)#1         | 1.959(3)  | O(2)#1-Cu(1)-O(2)#2  | 89.44(18)  |
| Cu(1)-O(1)           | 1.962(3)  | O(2)#1-Cu(1)-O(1)#3  | 90.21(14)  |
| Cu(1)-O(1)#3         | 1.962(3)  | O(2)#2-Cu(1)-O(1)    | 90.21(14)  |
| Cu(1)-O(5)           | 2.146(8)  | O(2)#1-Cu(1)-O(1)    | 168.22(18) |
| Cu(1)-O(2)#2         | 1.959(3)  | O(2)#2-Cu(1)-O(1)#3  | 168.22(18) |
| O(2)#2-Cu(1)-Cu(1)#1 | 83.66(14) | O(2)#2-Cu(1)-O(5)    | 95.3(2)    |
| O(2)#1-Cu(1)-O(5)    | 95.3(2)   | O(1)#3-Cu(1)-O(5)    | 96.5(2)    |
| O(1)#3-Cu(1)-Cu(1)#1 | 84.60(14) | O(5)-Cu(1)-Cu(1)#1   | 178.5(2)   |
| O(1)-Cu(1)-Cu(1)#1   | 84.60(14) | O(1)-Cu(1)-O(1)#3    | 87.7(2)    |
| O(1)-Cu(1)-O(5)      | 96.5(2)   |                      |            |

Symmetrical codes: #1 -x+1/2, -y+3/2, -z+1/2; #2 -x+1/2, y, -z+1/2; #3 x, -y+3/2, z; #4 -y+5/4, -x+5/4, -z+3/4.

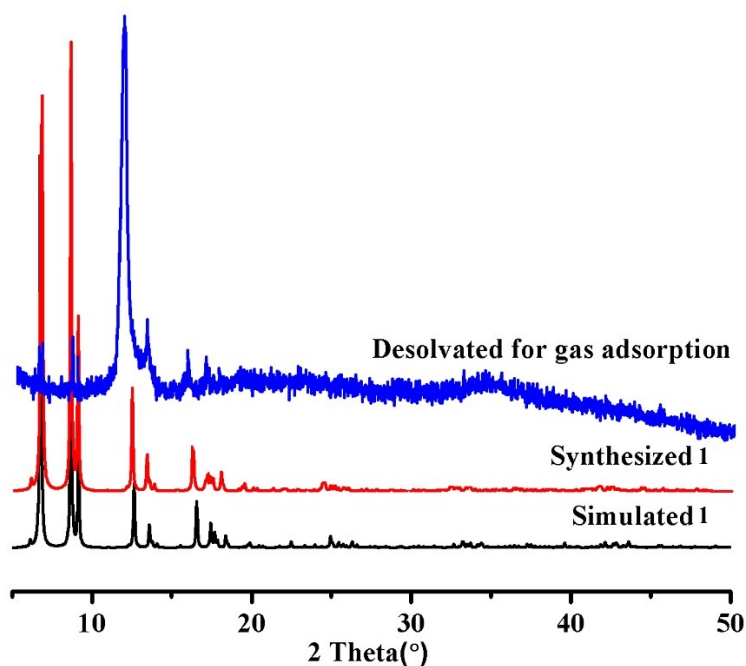

**Fig. S1.** PXRD patterns of **1** simulated from the X-ray single-crystal structure, experimental samples and desolvated samples (**1a**).

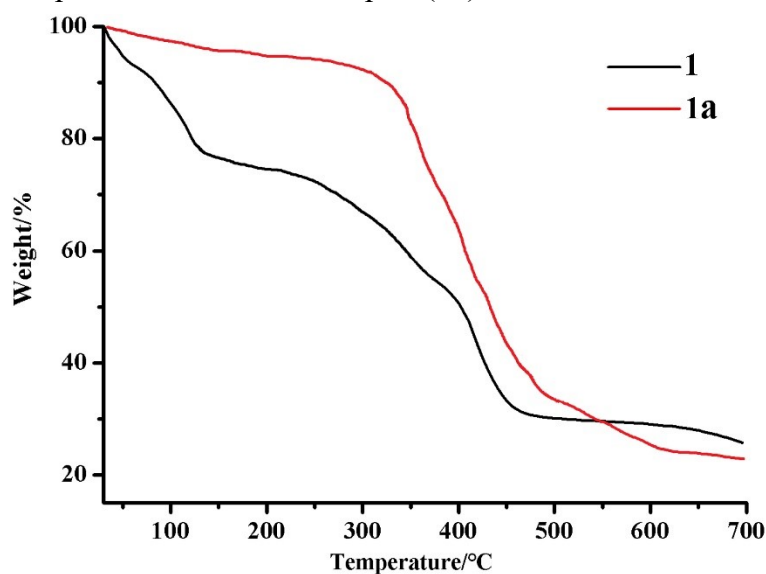

**Fig. S2.** TGA plots of complex **1** and **1a**.

### IAST adsorption selectivity calculation

The experimental isotherm data for pure CO<sub>2</sub> and CH<sub>4</sub> (measured at 273 and 298 K) were fitted using a Langmuir-Freundlich (L-F) model

$$q = \frac{a * b * p^c}{1 + b * p^c}$$

Where  $q$  and  $p$  are adsorbed amounts and pressures of component  $i$ , respectively. The adsorption selectivities for binary mixtures of CO<sub>2</sub>/CH<sub>4</sub> at 273 and 298 K and CO<sub>2</sub>/N<sub>2</sub> at 298 K., defined by

$$S_{ads} = (q_1 / q_2) / (p_1 / p_2)$$

Where  $q_i$  is the amount of  $i$  adsorbed and  $p_i$  is the partial pressure of  $i$  in the mixture.

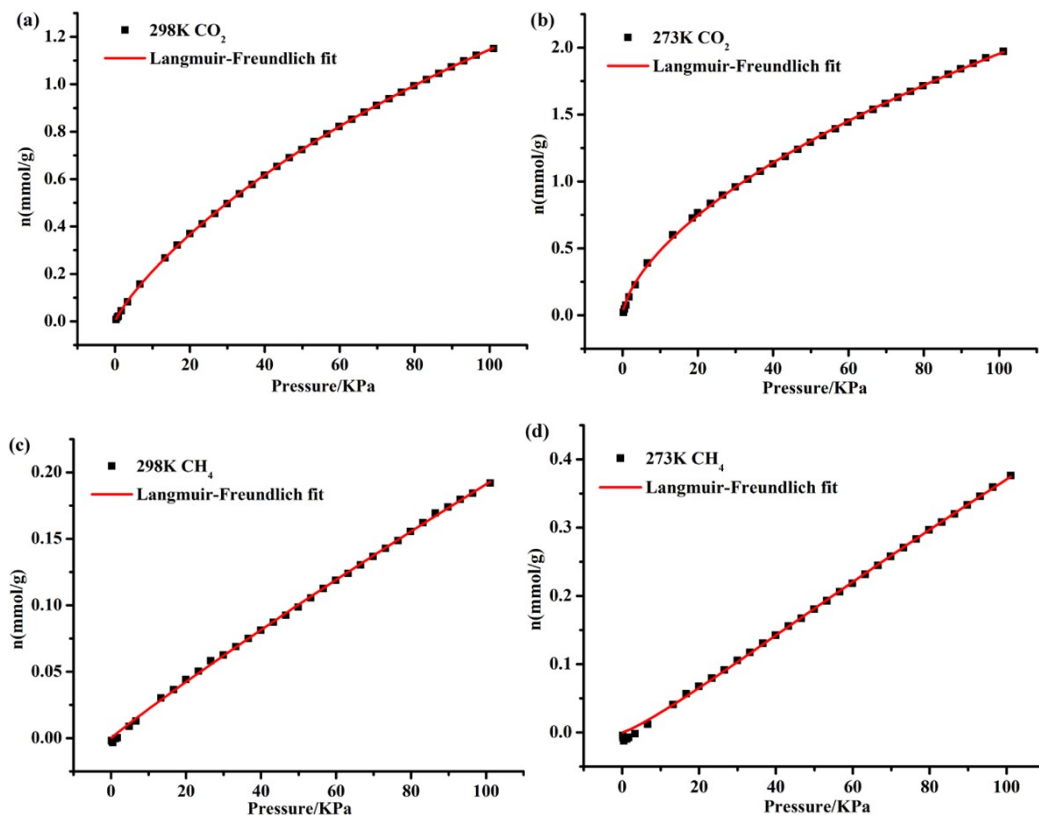

**Fig. S3.** CO<sub>2</sub> adsorption isotherms of **1a** at 273K with fitting by L-F model:  $a = 15.652$ ,  $b = 0.0071$ ,  $c = 0.6510$ ,  $\text{Chi}^2 = 1.75 \times 10^{-4}$ ,  $R^2 = 0.99951$ ; CO<sub>2</sub> adsorption isotherms of **1a** at 298K with fitting by L-F model:  $a = 4.0308$ ,  $b = 0.0076$ ,  $c = 0.8568$ ,  $\text{Chi}^2 = 6.18 \times 10^{-6}$ ,  $R^2 = 0.99995$ ; CH<sub>4</sub> adsorption isotherms of **1a** at 273K with fitting by L-F model:  $a = 2.04506$ ,  $b = 9.47 \times 10^{-4}$ ,  $c = 1.18421$ ,  $\text{Chi}^2 = 2.24 \times 10^{-5}$ ,  $R^2 = 0.99856$ ; CH<sub>4</sub> adsorption isotherms of **1a** at 298K with fitting by L-F model:  $a = 4.18026$ ,  $b = 5.7768$ ,  $c = 0.95923$ ,  $\text{Chi}^2 = 3.24 \times 10^{-6}$ ,  $R^2 = 0.99918$ .

### Calculation of sorption heat for CO<sub>2</sub> uptake using Virial 2 model

$$\ln P = \ln N + 1/T \sum_{i=0}^m aiN^i + \sum_{i=0}^n biN^i \quad Q_{st} = -R \sum_{i=0}^m aiN^i$$

The above equation was applied to fit the combined CO<sub>2</sub> isotherm data for desolvated **1a** at 273 and 298 K, where  $P$  is the pressure,  $N$  is the adsorbed amount,  $T$  is the temperature,  $ai$  and  $bi$  are virial coefficients, and  $m$  and  $n$  are the number of coefficients used to describe the isotherms.  $Q_{st}$  is the coverage-dependent enthalpy of adsorption and  $R$  is the universal gas constant.

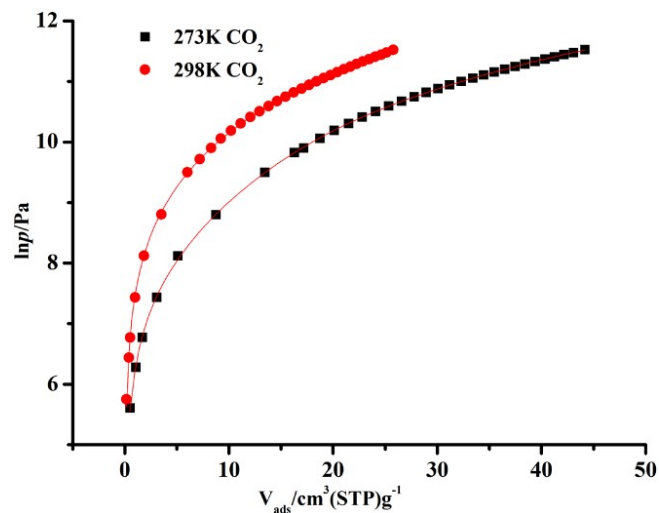

**Fig. S4.** Virial analysis of the CO<sub>2</sub> adsorption data at 273 and 298 K for **1a**. Fitting results:  $a_0 = -3989.33$ ,  $a_1 = -32.37$ ,  $a_2 = 8.24$ ,  $a_3 = -0.24$ ,  $a_4 = 0.0014$ ,  $\chi^2 = 0.00064$ ,  $R^2 = 0.9997$ .

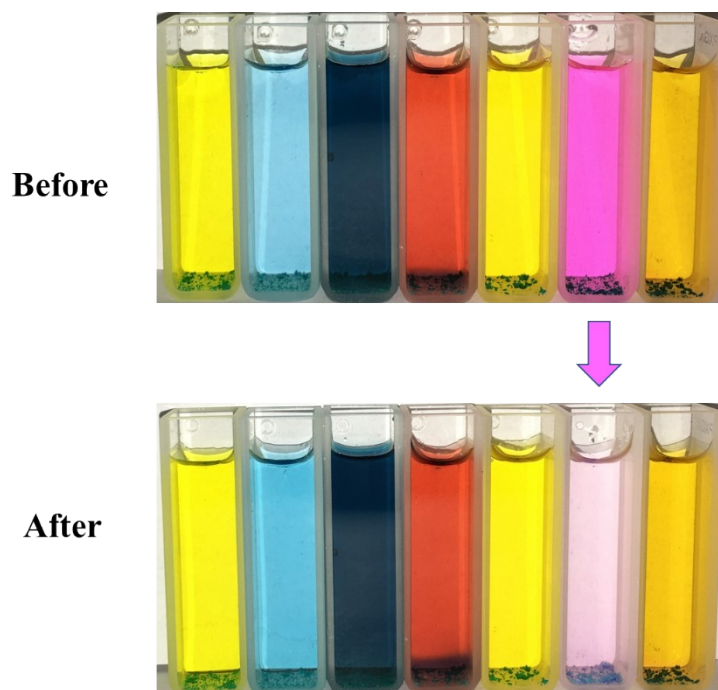

**Fig. S5.** Color differences of the H<sub>2</sub>O solutions with complex **1** in various dyes.

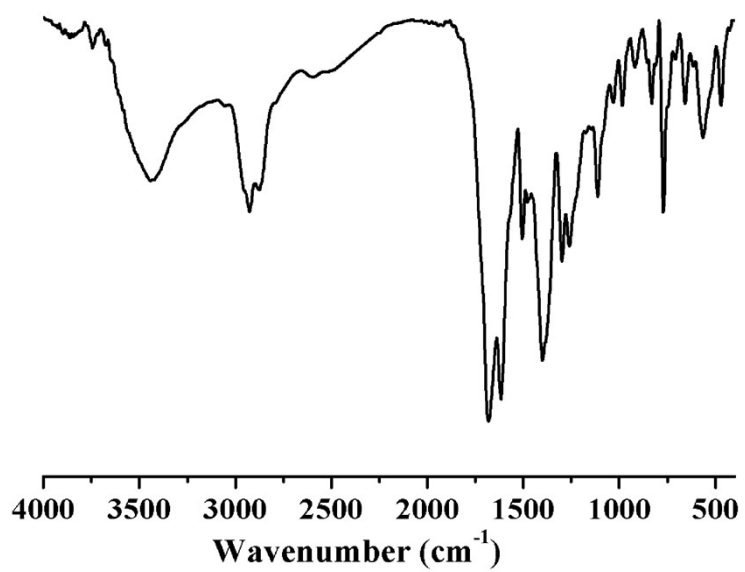

**Fig. S6.** The FT-IR spectra of complex 1.
